# Supplementary material for: Authorship Correction: Perspectives of Nonphysician Clinical Students and Medical Lecturers on Tablet-Based Health Care Practice Support for Medical Education in Zambia, Africa: Qualitative Study
Source: PubMed Central journal article supplement (PMC6468332; doi:10.2196/13431), 2019-04-03
Supplement: mhealth_v7i4e13431_app1.pdf [file mhealth_v7i4e13431_app1.pdf]

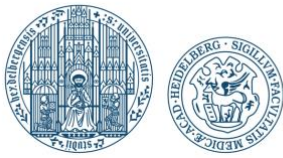

# HEIDELBERG UNIVERSITY HOSPITAL

Heidelberg University Hospital | Im Neuenheimer Feld 672 | 69120 Heidelberg

JMIR mHealth and uHealth  
Editors

**Sandra Barteit, M.A.**

Head of IT, Researcher  
Heidelberg Institute of Global  
Health

Corrigendum

## Corrigendum for published manuscript (#12637): “Perspectives of Nonphysician Clinical Students and Medical Lecturers on Tablet-Based Health Care Practice Support for Medical Education in Zambia, Africa: Qualitative Study”

17th January, 2019

Dear Editors

We have proofread the manuscript with the title “**Perspectives of Nonphysician Clinical Students and Medical Lecturers on Tablet-Based Health Care Practice Support for Medical Education in Zambia, Africa: Qualitative Study**” quite meticulously before giving the final approval for publication in JMIR mHealth and uHealth. However, we have found that - unfortunately - one author was not part of the co-authors of this publication (Annel Bowa), although initially he has been a co-author and he also signed the *Publication Form for JMIR Publications Authors*, which was uploaded for this publication on the JMIR platform.

Therefore, we would like to ask you to correct the published manuscript and add the co-author Annel Bowa to the currently listed co-authors.

The corrected list of authors should read as follows (the correction is highlighted in bold):

Sandra Barteit<sup>1</sup>, MA; Florian Neuhann<sup>1</sup>, MD; Till Bärnighausen<sup>1,2,3</sup>, MSc, MD, ScD, PhD; **Annel Bowa<sup>5</sup>, MSc**; Sigrid Lüders<sup>4</sup>, MD; Gregory Malunga<sup>5</sup>, MSc; Geoffrey Chileshe<sup>5</sup>, BSc; Clemence Marimo<sup>6</sup>, MD; Albrecht Jahn<sup>1</sup>, MSc, MD, PhD

Thank you for your understanding.

All authors approve of the adding of the co-author Annel Bowa:

Sandra Barteit

Florian Neuhann

Till Bärnighausen

Annel Bowa

Sigrid Lüders

Gregory Malunga

Geoffrey Chileshe

Clemence Marimo

Albrecht Jahn

Im Neuenheimer Feld 130.3  
69120 Heidelberg  
Fon +49 6221 56-34030  
Fax +49 6221 56-5948  
barteit@uni-heidelberg.de  
www.klinikum.uni-heidelberg.de

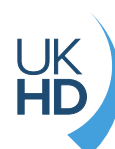

With best regards,

A handwritten signature in black ink, appearing to read 'Sandra Barteit'.

Sandra Barteit  
(corresponding author)
